# Supplementary material for: Farm-scale differentiation of active microbial colonizers
Source: Springer Nature journal article supplement (doi:10.1038/s43705-022-00120-9), 2022-04-20
Supplement: MOESM1 [file 43705_2022_120_MOESM1_ESM.pdf]

## Farm-scale differentiation of active microbial colonizers

William L King<sup>1</sup>, Laura M Kaminsky<sup>1</sup>, Sarah C Richards<sup>1,2,3</sup>, Brosi A Bradley<sup>4</sup>, Jason P Kaye<sup>2,4</sup>,  
Terrence H Bell<sup>1,2,3\*</sup>

1 - Department of Plant Pathology and Environmental Microbiology, The Pennsylvania State University, University Park, PA, 16802, USA

2 - Intercollege Graduate Degree Program in Ecology, The Pennsylvania State University, University Park, PA, 16802, USA

3 - Intercollege Graduate Degree Program in International Agriculture and Development, The Pennsylvania State University, University Park, PA, 16802, USA

4 - Department of Ecosystem Science and Management, The Pennsylvania State University, University Park, PA, 16802, USA

\*Correspondence:

Postal address: The Pennsylvania State University, 317 Buckhout Lab, University Park, PA, USA, 16802

Telephone number: 814-865-9653

Email: [thb15@psu.edu](mailto:thb15@psu.edu)

Supplementary Table 1: Soil analysis. Provided data includes pH, total nitrogen (N), total carbon (C), phosphorous (P), potassium (K), magnesium (Mg), calcium (Ca), organic matter (OM), zinc (Zn), copper (Cu) and sulfur (S). All units are parts per million (ppm) unless specified. Soil for deployment was collected from a farm and forest. Soil was deployed into a farm, grassy and forest location, and into an organically managed farm location (CCC). See Supplementary Table 2 for transect (A, B and C) locations.

| Soil           | pH  | N (%) | C (%) | P   | K   | Mg  | Ca   | OM (%) | Zn  | Cu  | S    | Textural class  |
|----------------|-----|-------|-------|-----|-----|-----|------|--------|-----|-----|------|-----------------|
| Farm*          | 6.3 | 0.14  | 1.34  | 17  | 126 | 115 | 1037 | 2.2    | 1.6 | 5.7 | 9.8  | Clay loam       |
| Forest*        | 5.2 | 0.59  | 7.34  | 12  | 158 | 220 | 735  | 12.6   | 6.2 | 1.5 | 12.7 | Loam            |
| Sterile Farm   | 6.7 | 0.09  | 0.92  | 34  | 114 | 67  | 923  | 1.8    | 1.0 | 2.5 | 24.8 | Loam            |
| Sterile Forest | 5.6 | 0.72  | 7.01  | 52  | 131 | 154 | 735  | 8.4    | 2.6 | 1.0 | 56.4 | Sandy loam      |
| A1_Farm        | 6.6 | 0.22  | 2.05  | 48  | 108 | 159 | 1063 | 3.4    | 1.4 | 0.9 | 6.7  | Silty clay loam |
| A2_Grass       | 5.8 | 0.40  | 3.64  | 32  | 112 | 107 | 583  | 6.0    | 2.5 | 1.0 | 9.6  | Silt loam       |
| A3_Forest      | 5.8 | 0.52  | 7.30  | 102 | 120 | 94  | 1435 | 10.3   | 4.3 | 1.2 | 13.5 | Silt loam       |
| B1_Farm        | 7.0 | 0.19  | 1.88  | 56  | 104 | 153 | 980  | 3.2    | 2.3 | 1.0 | 9.8  | Silty clay loam |
| B2_Grass       | 6.0 | 0.31  | 2.78  | 14  | 79  | 77  | 569  | 4.7    | 1.9 | 1.1 | 7.9  | Silt loam       |
| B3_Forest      | 6.1 | 0.45  | 6.16  | 53  | 104 | 97  | 1083 | 10.0   | 3.5 | 0.9 | 9.6  | Loam            |
| C1_Farm        | 6.9 | 0.18  | 1.81  | 32  | 98  | 140 | 740  | 3.0    | 1.0 | 0.8 | 6.1  | Clay loam       |
| C2_Grass       | 5.8 | 0.30  | 2.66  | 22  | 78  | 92  | 492  | 4.5    | 1.6 | 0.9 | 8.2  | Loam            |
| C3_Forest      | 5.6 | 0.57  | 7.47  | 39  | 130 | 102 | 947  | 11.3   | 3.9 | 1.0 | 9.3  | Loam            |
| CCC            | 6.8 | 0.15  | 1.47  | 32  | 135 | 137 | 934  | 2.5    | 1.8 | 5   | 7.5  | Clay loam       |

\*Soil was analyzed before sand addition

Supplementary Table 2: Transect deployment locations. All sites within and between transects were 20 m apart. All transects were deployed at the Pennsylvania State University at the Russell E. Larson Agricultural Research Center (40°42'53.0"N 77°55'51.2"W). CCC plots are the organically managed portion of the Research Center.

| Deployment          | Transect A                   | Transect B                   | Transect C                   |
|---------------------|------------------------------|------------------------------|------------------------------|
| Agricultural farm   | 40°42'53.2"N<br>77°55'51.5"W | 40°42'53.5"N<br>77°55'50.8"W | 40°42'53.7"N<br>77°55'50.1"W |
| Grassy intermediary | 40°42'52.6"N<br>77°55'51.1"W | 40°42'52.8"N<br>77°55'50.4"W | 40°42'53.0"N<br>77°55'49.7"W |
| Contiguous forest   | 40°42'52.0"N<br>77°55'50.9"W | 40°42'52.2"N<br>77°55'50.1"W | 40°42'52.4"N<br>77°55'49.2"W |
| CCC plots           | 40°43'17.6"N<br>77°55'40.2"W |                              |                              |

Supplementary Table 3: PERMANOVA comparisons between transformation methods. Shown data include rarefied data compared with a Bray-Curtis dissimilarity index and unrarefied center-log-transformed (clr) data with Euclidean distances.

| Gene | Factor                  | Bray-Curtis rarefied data                 | Euclidean clr data                        |
|------|-------------------------|-------------------------------------------|-------------------------------------------|
| 16S  | Location                | df = 3, F = 29, R2 = 0.26, $p \leq 0.001$ | df = 3, F = 19, R2 = 0.22, $p \leq 0.001$ |
|      | Soil                    | df = 1, F = 30, R2 = 0.09, $p \leq 0.001$ | df = 1, F = 16, R2 = 0.06, $p \leq 0.001$ |
|      | Timepoint               | df = 1, F = 25, R2 = 0.08, $p \leq 0.001$ | df = 1, F = 15, R2 = 0.06, $p \leq 0.001$ |
|      | Location:Soil           | df = 3, F = 7, R2 = 0.06, $p \leq 0.001$  | df = 3, F = 5, R2 = 0.05, $p \leq 0.001$  |
|      | Location:Timepoint      | df = 2, F = 8, R2 = 0.05, $p \leq 0.001$  | df = 2, F = 6, R2 = 0.05, $p \leq 0.001$  |
|      | Soil:Timepoint          | df = 1, F = 7, R2 = 0.02, $p \leq 0.001$  | df = 1, F = 4, R2 = 0.02, $p \leq 0.001$  |
|      | Location:Soil:Timepoint | df = 2, F = 4, R2 = 0.02, $p \leq 0.001$  | df = 2, F = 3, R2 = 0.02, $p \leq 0.001$  |
|      | Residuals               | df = 137                                  | df = 137                                  |
| ITS  | Total                   | df = 150                                  | df = 150                                  |
|      | Location                | df = 3, F = 25, R2 = 0.31, $p \leq 0.001$ | df = 3, F = 23, R2 = 0.29, $p \leq 0.001$ |
|      | Soil                    | df = 1, F = 5, R2 = 0.02, $p \leq 0.001$  | df = 1, F = 5, R2 = 0.02, $p \leq 0.001$  |
|      | Timepoint               | df = 1, F = 6, R2 = 0.02, $p \leq 0.001$  | df = 1, F = 7, R2 = 0.03, $p \leq 0.001$  |
|      | Location:Soil           | df = 3, F = 3, R2 = 0.03, $p \leq 0.001$  | df = 3, F = 3, R2 = 0.04, $p \leq 0.001$  |
|      | Location:Timepoint      | df = 2, F = 4, R2 = 0.04, $p \leq 0.001$  | df = 2, F = 5, R2 = 0.04, $p \leq 0.001$  |
|      | Soil:Timepoint          | df = 1, F = 2, R2 = 0.007, $p = 0.06$     | df = 1, F = 2, R2 = 0.008, $p = 0.01$     |
|      | Location:Soil:Timepoint | df = 2, F = 1, R2 = 0.01, $p = 0.07$      | df = 2, F = 2, R2 = 0.01, $p = 0.02$      |
|      | Residuals               | df = 137                                  | df = 137                                  |
|      | Total                   | df = 150                                  | df = 150                                  |



Supplementary Table 4: PERMANOVA location comparison with grouped soil-types

| Timepoint | Gene        | Overall                                           | Location (grouped soil-type)                                                                                                                                                                                                                                                                                                                                                                                 |
|-----------|-------------|---------------------------------------------------|--------------------------------------------------------------------------------------------------------------------------------------------------------------------------------------------------------------------------------------------------------------------------------------------------------------------------------------------------------------------------------------------------------------|
| 1 week    | 16S<br>rRNA | $F_{2,68} = 17$<br>$R^2 = 0.33$<br>$p \leq 0.001$ | Farm vs. Grass: $F_{1,45} = 19$ , $R^2 = 0.30$ , $p \leq 0.001$<br>Farm vs. Forest: $F_{1,45} = 15$ , $R^2 = 0.25$ , $p \leq 0.001$<br>Forest vs. Grass: $F_{1,46} = 16$ , $R^2 = 0.26$ , $p \leq 0.001$                                                                                                                                                                                                     |
|           | ITS         | $F_{2,69} = 23$<br>$R^2 = 0.40$<br>$p \leq 0.001$ | Farm vs. Grass: $F_{1,46} = 25$ , $R^2 = 0.35$ , $p \leq 0.001$<br>Farm vs. Forest: $F_{1,46} = 13$ , $R^2 = 0.22$ , $p \leq 0.001$<br>Forest vs. Grass: $F_{1,46} = 35$ , $R^2 = 0.43$ , $p \leq 0.001$                                                                                                                                                                                                     |
| 10 weeks  | 16S<br>rRNA | $F_{3,76} = 13$<br>$R^2 = 0.33$<br>$p \leq 0.001$ | Farm vs. Grass: $F_{1,46} = 19$ , $R^2 = 0.30$ , $p \leq 0.001$<br>Farm vs. Forest: $F_{1,46} = 11$ , $R^2 = 0.20$ , $p \leq 0.001$<br>Forest vs. Grass: $F_{1,46} = 12$ , $R^2 = 0.21$ , $p \leq 0.001$<br>Farm vs. CCC: $F_{1,30} = 8$ , $R^2 = 0.22$ , $p \leq 0.001$<br>Grass vs. CCC: $F_{1,30} = 14$ , $R^2 = 0.32$ , $p \leq 0.001$<br>Forest vs. CCC: $F_{1,30} = 8$ , $R^2 = 0.22$ , $p \leq 0.001$ |
|           | ITS         | $F_{3,75} = 11$<br>$R^2 = 0.31$<br>$p \leq 0.001$ | Farm vs. Grass: $F_{1,45} = 18$ , $R^2 = 0.29$ , $p \leq 0.001$<br>Farm vs. Forest: $F_{1,46} = 7$ , $R^2 = 0.13$ , $p \leq 0.001$<br>Forest vs. Grass: $F_{1,46} = 17$ , $R^2 = 0.26$ , $p \leq 0.001$<br>Farm vs. CCC: $F_{1,29} = 4$ , $R^2 = 0.13$ , $p \leq 0.001$<br>Grass vs. CCC: $F_{1,30} = 16$ , $R^2 = 0.35$ , $p \leq 0.001$<br>Forest vs. CCC: $F_{1,30} = 6$ , $R^2 = 0.18$ , $p \leq 0.001$  |

Supplementary Table 5: PERMANOVA location comparison with individual soil-types for week  
1

| Timepoint | Gene        | Soil-type | Overall                                           | Location (individual soil-type)                                                                                                                                                                          |
|-----------|-------------|-----------|---------------------------------------------------|----------------------------------------------------------------------------------------------------------------------------------------------------------------------------------------------------------|
| 1 week    | 16S<br>rRNA | Farm      | $F_{2,33} = 16$<br>$R^2 = 0.50$<br>$p \leq 0.001$ | Farm vs. Grass: $F_{1,22} = 20$ , $R^2 = 0.48$ , $p \leq 0.001$<br>Farm vs. Forest: $F_{1,22} = 15$ , $R^2 = 0.41$ , $p \leq 0.001$<br>Forest vs. Grass: $F_{1,22} = 14$ , $R^2 = 0.39$ , $p \leq 0.001$ |
|           |             | Forest    | $F_{2,32} = 13$<br>$R^2 = 0.45$<br>$p \leq 0.001$ | Farm vs. Grass: $F_{1,21} = 16$ , $R^2 = 0.43$ , $p \leq 0.001$<br>Farm vs. Forest: $F_{1,21} = 10$ , $R^2 = 0.32$ , $p \leq 0.001$<br>Forest vs. Grass: $F_{1,22} = 14$ , $R^2 = 0.39$ , $p \leq 0.001$ |
|           | ITS         | Farm      | $F_{2,33} = 14$<br>$R^2 = 0.45$<br>$p \leq 0.001$ | Farm vs. Grass: $F_{1,22} = 16$ , $R^2 = 0.41$ , $p \leq 0.001$<br>Farm vs. Forest: $F_{1,22} = 9$ , $R^2 = 0.29$ , $p \leq 0.001$<br>Forest vs. Grass: $F_{1,22} = 18$ , $R^2 = 0.44$ , $p \leq 0.001$  |
|           |             | Forest    | $F_{2,33} = 12$<br>$R^2 = 0.43$<br>$p \leq 0.001$ | Farm vs. Grass: $F_{1,22} = 13$ , $R^2 = 0.38$ , $p \leq 0.001$<br>Farm vs. Forest: $F_{1,22} = 7$ , $R^2 = 0.23$ , $p \leq 0.001$<br>Forest vs. Grass: $F_{1,22} = 21$ , $R^2 = 0.49$ , $p \leq 0.001$  |

Supplementary Table 6: PERMANOVA location comparison with individual soil-types for week 10

| Timepoint | Gene     | Soil-type | Overall                                           | Location (individual soil-type)                                                                                                                                                                                                                                                                                                                                                                                |
|-----------|----------|-----------|---------------------------------------------------|----------------------------------------------------------------------------------------------------------------------------------------------------------------------------------------------------------------------------------------------------------------------------------------------------------------------------------------------------------------------------------------------------------------|
| 10 weeks  | 16S rRNA | Farm      | $F_{3,36} = 13$<br>$R^2 = 0.52$<br>$p \leq 0.001$ | Farm vs. Grass: $F_{1,22} = 19$ , $R^2 = 0.46$ , $p \leq 0.001$<br>Farm vs. Forest: $F_{1,22} = 11$ , $R^2 = 0.34$ , $p \leq 0.001$<br>Forest vs. Grass: $F_{1,22} = 14$ , $R^2 = 0.39$ , $p \leq 0.001$<br>Farm vs. CCC: $F_{1,14} = 10$ , $R^2 = 0.42$ , $p \leq 0.001$<br>Grass vs. CCC: $F_{1,14} = 14$ , $R^2 = 0.50$ , $p \leq 0.001$<br>Forest vs. CCC: $F_{1,14} = 10$ , $R^2 = 0.42$ , $p \leq 0.001$ |
|           |          | Forest    | $F_{3,36} = 10$<br>$R^2 = 0.46$<br>$p \leq 0.001$ | Farm vs. Grass: $F_{1,22} = 17$ , $R^2 = 0.43$ , $p \leq 0.001$<br>Farm vs. Forest: $F_{1,22} = 9$ , $R^2 = 0.30$ , $p \leq 0.001$<br>Forest vs. Grass: $F_{1,22} = 9$ , $R^2 = 0.30$ , $p \leq 0.001$<br>Farm vs. CCC: $F_{1,14} = 6$ , $R^2 = 0.29$ , $p \leq 0.001$<br>Grass vs. CCC: $F_{1,14} = 14$ , $R^2 = 0.50$ , $p \leq 0.001$<br>Forest vs. CCC: $F_{1,14} = 6$ , $R^2 = 0.31$ , $p \leq 0.001$     |
|           | ITS      | Farm      | $F_{3,36} = 5$<br>$R^2 = 0.31$<br>$p \leq 0.001$  | Farm vs. Grass: $F_{1,22} = 9$ , $R^2 = 0.30$ , $p \leq 0.001$<br>Farm vs. Forest: $F_{1,22} = 4$ , $R^2 = 0.15$ , $p \leq 0.001$<br>Forest vs. Grass: $F_{1,22} = 8$ , $R^2 = 0.26$ , $p \leq 0.001$<br>Farm vs. CCC: $F_{1,14} = 2$ , $R^2 = 0.14$ , $p = 0.04$<br>Grass vs. CCC: $F_{1,14} = 7$ , $R^2 = 0.34$ , $p \leq 0.001$<br>Forest vs. CCC: $F_{1,22} = 3$ , $R^2 = 0.16$ , $p \leq 0.001$           |
|           |          | Forest    | $F_{3,35} = 10$<br>$R^2 = 0.45$<br>$p \leq 0.001$ | Farm vs. Grass: $F_{1,21} = 13$ , $R^2 = 0.38$ , $p \leq 0.001$<br>Farm vs. Forest: $F_{1,21} = 5$ , $R^2 = 0.20$ , $p \leq 0.001$<br>Forest vs. Grass: $F_{1,22} = 15$ , $R^2 = 0.40$ , $p \leq 0.001$<br>Farm vs. CCC: $F_{1,13} = 4$ , $R^2 = 0.25$ , $p = 0.002$<br>Grass vs. CCC: $F_{1,14} = 16$ , $R^2 = 0.54$ , $p \leq 0.001$<br>Forest vs. CCC: $F_{1,14} = 7$ , $R^2 = 0.35$ , $p = 0.002$          |
|           |          |           |                                                   |                                                                                                                                                                                                                                                                                                                                                                                                                |
|           |          |           |                                                   |                                                                                                                                                                                                                                                                                                                                                                                                                |

Supplementary Table 7: PERMANOVA comparisons of deployed soil-type comparisons within locations

| Timepoint | Gene     | Soil-type comparison                                                                                                                                                                                                        |
|-----------|----------|-----------------------------------------------------------------------------------------------------------------------------------------------------------------------------------------------------------------------------|
| 1 week    | 16S rRNA | Farm: $F_{1,21} = 8$ , $R^2 = 0.27$ , $p \leq 0.001$<br>Forest: $F_{1,22} = 7$ , $R^2 = 0.25$ , $p \leq 0.001$<br>Grass: $F_{1,22} = 14$ , $R^2 = 0.39$ , $p \leq 0.001$                                                    |
|           | ITS      | Farm: $F_{1,22} = 3$ , $R^2 = 0.11$ , $p = 0.002$<br>Forest: Not significant<br>Grass: Not significant                                                                                                                      |
| 10 weeks  | 16S rRNA | Farm: $F_{1,22} = 10$ , $R^2 = 0.31$ , $p \leq 0.001$<br>Forest: $F_{1,22} = 9$ , $R^2 = 0.29$ , $p \leq 0.001$<br>Grass: $F_{1,22} = 13$ , $R^2 = 0.37$ , $p \leq 0.001$<br>CCC: $F_{1,6} = 6$ , $R^2 = 0.48$ , $p = 0.04$ |
|           | ITS      | Farm: $F_{1,22} = 3$ , $R^2 = 0.12$ , $p = 0.02$<br>Forest: $F_{1,22} = 3$ , $R^2 = 0.12$ , $p \leq 0.001$<br>Grass: $F_{1,22} = 3$ , $R^2 = 0.14$ , $p = 0.002$<br>CCC: Not significant                                    |

Supplementary Table 8: PERMANOVA transect comparisons within locations at the 1-week timepoint.

| Gene        | Location | Soil-type | Overall                                          | Location (individual soil-type)                                                                                                                                   |
|-------------|----------|-----------|--------------------------------------------------|-------------------------------------------------------------------------------------------------------------------------------------------------------------------|
| 16S<br>rRNA | Farm     | Farm      | $F_{2,9} = 7$<br>$R^2 = 0.59$<br>$p \leq 0.001$  | A vs. B: $F_{1,6} = 9$ , $R^2 = 0.59$ , $p = 0.03$<br>A vs. C: $F_{1,6} = 6$ , $R^2 = 0.50$ , $p = 0.03$<br>B vs. C: $F_{1,6} = 5$ , $R^2 = 0.47$ , $p = 0.03$    |
|             |          | Forest    | $F_{2,8} = 7$<br>$R^2 = 0.64$<br>$p \leq 0.001$  | A vs. B: $F_{1,6} = 6$ , $R^2 = 0.50$ , $p = 0.03$<br>A vs. C: $F_{1,5} = 7$ , $R^2 = 0.59$ , $p = 0.02$<br>B vs. C: $F_{1,6} = 8$ , $R^2 = 0.62$ , $p = 0.03$    |
|             | Forest   | Farm      | $F_{2,9} = 8$<br>$R^2 = 0.65$<br>$p \leq 0.001$  | A vs. B: $F_{1,6} = 7$ , $R^2 = 0.54$ , $p = 0.03$<br>A vs. C: $F_{1,6} = 7$ , $R^2 = 0.53$ , $p = 0.02$<br>B vs. C: $F_{1,6} = 15$ , $R^2 = 0.71$ , $p = 0.03$   |
|             |          | Forest    | $F_{2,9} = 8$<br>$R^2 = 0.65$<br>$p \leq 0.001$  | A vs. B: $F_{1,6} = 6$ , $R^2 = 0.50$ , $p = 0.04$<br>A vs. C: $F_{1,6} = 8$ , $R^2 = 0.58$ , $p = 0.03$<br>B vs. C: $F_{1,6} = 14$ , $R^2 = 0.70$ , $p = 0.03$   |
|             | Grass    | Farm      | $F_{2,9} = 6$<br>$R^2 = 0.58$<br>$p \leq 0.001$  | A vs. B: $F_{1,6} = 5$ , $R^2 = 0.45$ , $p = 0.04$<br>A vs. C: $F_{1,6} = 8$ , $R^2 = 0.57$ , $p = 0.03$<br>B vs. C: $F_{1,6} = 6$ , $R^2 = 0.49$ , $p = 0.02$    |
|             |          | Forest    | $F_{2,9} = 5$<br>$R^2 = 0.53$<br>$p = 0.002$     | A vs. B: $F_{1,6} = 5$ , $R^2 = 0.45$ , $p = 0.03$<br>A vs. C: $F_{1,6} = 5$ , $R^2 = 0.47$ , $p = 0.03$<br>B vs. C: $F_{1,6} = 5$ , $R^2 = 0.46$ , $p = 0.03$    |
| ITS         | Farm     | Farm      | $F_{2,9} = 2$<br>$R^2 = 0.29$<br>$p = 0.03$      | A vs. B: $F_{1,6} = 2$ , $R^2 = 0.28$ , $p = 0.02$<br>A vs. C: $F_{1,6} = 2$ , $R^2 = 0.28$ , $p = 0.03$<br>B vs. C: NS                                           |
|             |          | Forest    | $F_{2,9} = 2$<br>$R^2 = 0.28$<br>$p = 0.02$      | A vs. B: $F_{1,6} = 2$ , $R^2 = 0.29$ , $p = 0.04$<br>A vs. C: NS<br>B vs. C: $F_{1,6} = 2$ , $R^2 = 0.22$ , $p = 0.03$                                           |
|             | Forest   | Farm      | $F_{2,9} = 7$<br>$R^2 = 0.60$<br>$p \leq 0.001$  | A vs. B: $F_{1,6} = 5$ , $R^2 = 0.45$ , $p = 0.04$<br>A vs. C: $F_{1,6} = 5$ , $R^2 = 0.44$ , $p = 0.03$<br>B vs. C: $F_{1,6} = 24$ , $R^2 = 0.80$ , $p = 0.02$   |
|             |          | Forest    | $F_{2,9} = 8$<br>$R^2 = 0.64$<br>$p \leq 0.001$  | A vs. B: $F_{1,6} = 7$ , $R^2 = 0.55$ , $p = 0.02$<br>A vs. C: NS ( $p = 0.056$ )<br>B vs. C: $F_{1,6} = 15$ , $R^2 = 0.72$ , $p = 0.03$                          |
|             | Grass    | Farm      | $F_{2,9} = 18$<br>$R^2 = 0.80$<br>$p \leq 0.001$ | A vs. B: $F_{1,6} = 23$ , $R^2 = 0.79$ , $p = 0.03$<br>A vs. C: $F_{1,6} = 19$ , $R^2 = 0.76$ , $p = 0.03$<br>B vs. C: $F_{1,6} = 12$ , $R^2 = 0.66$ , $p = 0.04$ |
|             |          | Forest    | $F_{2,9} = 12$<br>$R^2 = 0.74$<br>$p \leq 0.001$ | A vs. B: $F_{1,6} = 9$ , $R^2 = 0.59$ , $p = 0.04$<br>A vs. C: $F_{1,6} = 14$ , $R^2 = 0.71$ , $p = 0.02$<br>B vs. C: $F_{1,6} = 17$ , $R^2 = 0.73$ , $p = 0.03$  |

Supplementary Table 9: PERMANOVA transect comparisons within locations at the 10-week timepoint.

| Gene        | Location | Soil-type | Overall                                         | Location (individual soil-type)                                                                                                                                  |
|-------------|----------|-----------|-------------------------------------------------|------------------------------------------------------------------------------------------------------------------------------------------------------------------|
| 16S<br>rRNA | Farm     | Farm      | $F_{2,9} = 8$<br>$R^2 = 0.64$<br>$p \leq 0.001$ | A vs. B: $F_{1,6} = 4$ , $R^2 = 0.42$ , $p = 0.03$<br>A vs. C: $F_{1,6} = 10$ , $R^2 = 0.64$ , $p = 0.03$<br>B vs. C: $F_{1,6} = 10$ , $R^2 = 0.63$ , $p = 0.03$ |
|             |          | Forest    | $F_{2,9} = 4$<br>$R^2 = 0.48$<br>$p \leq 0.001$ | A vs. B: $F_{1,6} = 2$ , $R^2 = 0.27$ , $p = 0.03$<br>A vs. C: $F_{1,6} = 6$ , $R^2 = 0.49$ , $p = 0.02$<br>B vs. C: $F_{1,6} = 5$ , $R^2 = 0.43$ , $p = 0.03$   |
|             | Forest   | Farm      | $F_{2,9} = 6$<br>$R^2 = 0.58$<br>$p \leq 0.001$ | A vs. B: $F_{1,6} = 7$ , $R^2 = 0.53$ , $p = 0.04$<br>A vs. C: $F_{1,6} = 5$ , $R^2 = 0.47$ , $p = 0.03$<br>B vs. C: $F_{1,6} = 6$ , $R^2 = 0.50$ , $p = 0.03$   |
|             |          | Forest    | $F_{2,9} = 6$<br>$R^2 = 0.58$<br>$p \leq 0.001$ | A vs. B: $F_{1,6} = 9$ , $R^2 = 0.59$ , $p = 0.02$<br>A vs. C: $F_{1,6} = 4$ , $R^2 = 0.39$ , $p = 0.03$<br>B vs. C: $F_{1,6} = 7$ , $R^2 = 0.55$ , $p = 0.03$   |
|             | Grass    | Farm      | $F_{2,9} = 7$<br>$R^2 = 0.61$<br>$p \leq 0.001$ | A vs. B: $F_{1,6} = 8$ , $R^2 = 0.56$ , $p = 0.03$<br>A vs. C: $F_{1,6} = 8$ , $R^2 = 0.57$ , $p = 0.03$<br>B vs. C: $F_{1,6} = 5$ , $R^2 = 0.47$ , $p = 0.04$   |
|             |          | Forest    | $F_{2,9} = 5$<br>$R^2 = 0.51$<br>$p \leq 0.001$ | A vs. B: $F_{1,6} = 6$ , $R^2 = 0.52$ , $p = 0.03$<br>A vs. C: $F_{1,6} = 4$ , $R^2 = 0.37$ , $p = 0.02$<br>B vs. C: $F_{1,6} = 5$ , $R^2 = 0.44$ , $p = 0.03$   |
| ITS         | Farm     | Farm      | $F_{2,9} = 3$<br>$R^2 = 0.42$<br>$p = 0.003$    | A vs. B: NS<br>A vs. C: $F_{1,6} = 4$ , $R^2 = 0.41$ , $p = 0.04$<br>B vs. C: $F_{1,6} = 5$ , $R^2 = 0.44$ , $p = 0.03$                                          |
|             |          | Forest    | $F_{2,8} = 2$<br>$R^2 = 0.36$<br>$p = 0.03$     | A vs. B: NS<br>A vs. C: NS<br>B vs. C: NS                                                                                                                        |
|             | Forest   | Farm      | $F_{2,9} = 2$<br>$R^2 = 0.34$<br>$p \leq 0.001$ | A vs. B: $F_{1,6} = 2$ , $R^2 = 0.24$ , $p = 0.03$<br>A vs. C: $F_{1,6} = 2$ , $R^2 = 0.28$ , $p = 0.03$<br>B vs. C: $F_{1,6} = 3$ , $R^2 = 0.31$ , $p = 0.03$   |
|             |          | Forest    | $F_{2,9} = 4$<br>$R^2 = 0.45$<br>$p \leq 0.001$ | A vs. B: $F_{1,6} = 5$ , $R^2 = 0.45$ , $p = 0.03$<br>A vs. C: NS<br>B vs. C: $F_{1,6} = 5$ , $R^2 = 0.44$ , $p = 0.03$                                          |
|             | Grass    | Farm      | $F_{2,9} = 6$<br>$R^2 = 0.59$<br>$p \leq 0.001$ | A vs. B: $F_{1,6} = 7$ , $R^2 = 0.54$ , $p = 0.03$<br>A vs. C: $F_{1,6} = 9$ , $R^2 = 0.60$ , $p = 0.03$<br>B vs. C: $F_{1,6} = 4$ , $R^2 = 0.43$ , $p = 0.02$   |
|             |          | Forest    | $F_{2,9} = 5$<br>$R^2 = 0.53$<br>$p \leq 0.001$ | A vs. B: $F_{1,6} = 7$ , $R^2 = 0.53$ , $p = 0.03$<br>A vs. C: $F_{1,6} = 6$ , $R^2 = 0.50$ , $p = 0.03$<br>B vs. C: $F_{1,6} = 3$ , $R^2 = 0.36$ , $p = 0.03$   |

Supplementary Table 10: PERMANOVA recolonized soil comparisons to bulk soil.

| Location    | Overall                                            | Comparison to Bulk soil (grouped soil-type)                                                                                                                                                                                    |
|-------------|----------------------------------------------------|--------------------------------------------------------------------------------------------------------------------------------------------------------------------------------------------------------------------------------|
| 16S<br>rRNA | $F_{1,96} = 39$<br>$R^2 = 0.29$<br>$p \leq 0.001$  | Farm: $F_{1,30} = 20$ , $R^2 = 0.40$ , $p \leq 0.001$<br>Forest: $F_{1,31} = 29$ , $R^2 = 0.48$ , $p \leq 0.001$<br>Grass: $F_{1,31} = 44$ , $R^2 = 0.59$ , $p \leq 0.001$                                                     |
| ITS         | $F_{1,97} = 8$<br>$R^2 = 0.08$<br>$p \leq 0.001$   | Farm: $F_{1,31} = 6$ , $R^2 = 0.16$ , $p \leq 0.001$<br>Forest: $F_{1,31} = 10$ , $R^2 = 0.24$ , $p \leq 0.001$<br>Grass: $F_{1,31} = 13$ , $R^2 = 0.30$ , $p \leq 0.001$                                                      |
| 16S<br>rRNA | $F_{1,108} = 32$<br>$R^2 = 0.23$<br>$p \leq 0.001$ | Farm: $F_{1,31} = 21$ , $R^2 = 0.40$ , $p \leq 0.001$<br>Forest: $F_{1,31} = 18$ , $R^2 = 0.37$ , $p \leq 0.001$<br>Grass: $F_{1,31} = 34$ , $R^2 = 0.52$ , $p \leq 0.001$<br>CCC: $F_{1,9} = 10$ , $R^2 = 0.53$ , $p = 0.008$ |
| ITS         | $F_{1,107} = 6$<br>$R^2 = 0.05$<br>$p \leq 0.001$  | Farm: $F_{1,30} = 6$ , $R^2 = 0.16$ , $p \leq 0.001$<br>Forest: $F_{1,31} = 4$ , $R^2 = 0.11$ , $p \leq 0.001$<br>Grass: $F_{1,31} = 10$ , $R^2 = 0.25$ , $p \leq 0.001$<br>CCC: $F_{1,9} = 4$ , $R^2 = 0.28$ , $p = 0.009$    |

Supplementary Table 11: Comparisons of Bray-Curtis dissimilarity values for bulk soil versus recolonized soil. Comparisons are between bacterial and fungal compositions at each time point. Overall comparison is a Kruskal-Wallis test followed by a Dunnett's post-hoc test.

| Location | Overall                                         | Individual timepoint comparison                         |
|----------|-------------------------------------------------|---------------------------------------------------------|
| Farm     | Degrees of freedom = 3<br>H = 119,<br>p < 0.001 | 1 week: Z = 10, q < 0.001<br>10 weeks: Z = 4, q < 0.001 |
| Forest   | Degrees of freedom = 3<br>H = 123,<br>p < 0.001 | 1 week: Z = 7, q < 0.001<br>10 weeks: Z = 3, q = 0.01   |
| Grass    | Degrees of freedom = 3<br>H = 250,<br>p < 0.001 | 1 week: Z = 15, q < 0.001<br>10 weeks: Z = 6, q < 0.001 |
| CCC      | Degrees of freedom = 1<br>H = 15,<br>p < 0.001  | NA*                                                     |

\*Only one time-point was sample



Supplementary Table 12: Core bacterial genera present in 100 % of samples and more than 0.1 % averaged relative abundance at the 1-week timepoint.

| Farm                                                                                                                                                                 | Grass                                                                                                                                                                                                                                                                           | Forest                                                                                                                                                                                                                                                                            | All locations                                                                                                                                                                                             |
|----------------------------------------------------------------------------------------------------------------------------------------------------------------------|---------------------------------------------------------------------------------------------------------------------------------------------------------------------------------------------------------------------------------------------------------------------------------|-----------------------------------------------------------------------------------------------------------------------------------------------------------------------------------------------------------------------------------------------------------------------------------|-----------------------------------------------------------------------------------------------------------------------------------------------------------------------------------------------------------|
| <p>Paenarthrobacter</p> <p>Chryseobacterium</p> <p>Achromobacter</p> <p>Ensifer</p> <p>Unclassified Micrococcaceae</p> <p>Sphingobacterium</p> <p>Curtobacterium</p> | <p>Novosphingobium</p> <p>Flavobacterium</p> <p>Paenibacillus</p> <p>Bdellovibrio</p> <p>Unclassified Comamonadaceae</p> <p>Brevundimonas</p> <p>Caulobacter</p> <p>Devosia</p> <p>Luteibacter</p> <p>Pseudomonas</p> <p>Unclassified Oxalobacteraceae</p> <p>Acinetobacter</p> | <p>Novosphingobium</p> <p>Flavobacterium</p> <p>Paenibacillus</p> <p>Duganella</p> <p>Unclassified Comamonadaceae</p> <p>Brevundimonas</p> <p>Cupriavidus</p> <p>Devosia</p> <p>Stenotrophomonas</p> <p>Pseudomonas</p> <p>Unclassified Oxalobacteraceae</p> <p>Acinetobacter</p> | <p>Pedobacter</p> <p>Dyadobacter</p> <p>Allorhizobium-Neorhizobium-</p> <p>Pararhizobium-Rhizobium</p> <p>Sphingomonas</p> <p>Unclassified Enterobacteriaceae</p> <p>Stenotrophomonas</p> <p>Massilia</p> |

Supplementary Table 13: Core fungal genera present in 100 % of samples and more than 0.1 % averaged relative abundance at the 1-week timepoint.

| Farm     | Grass                                                                                                                                                                           | Forest                     | All locations |
|----------|---------------------------------------------------------------------------------------------------------------------------------------------------------------------------------|----------------------------|---------------|
| Fusarium | Cryptococcus<br>Unclassified Fungi<br>Fusarium<br>Vishniacozyma<br>Pyrenochaetopsis<br>Hannaella<br>Unclassified Phaeosphaeriaceae<br>Papiliotrema<br>Cladosporium<br>Saitozyma | Alternaria<br>Cladosporium | None          |

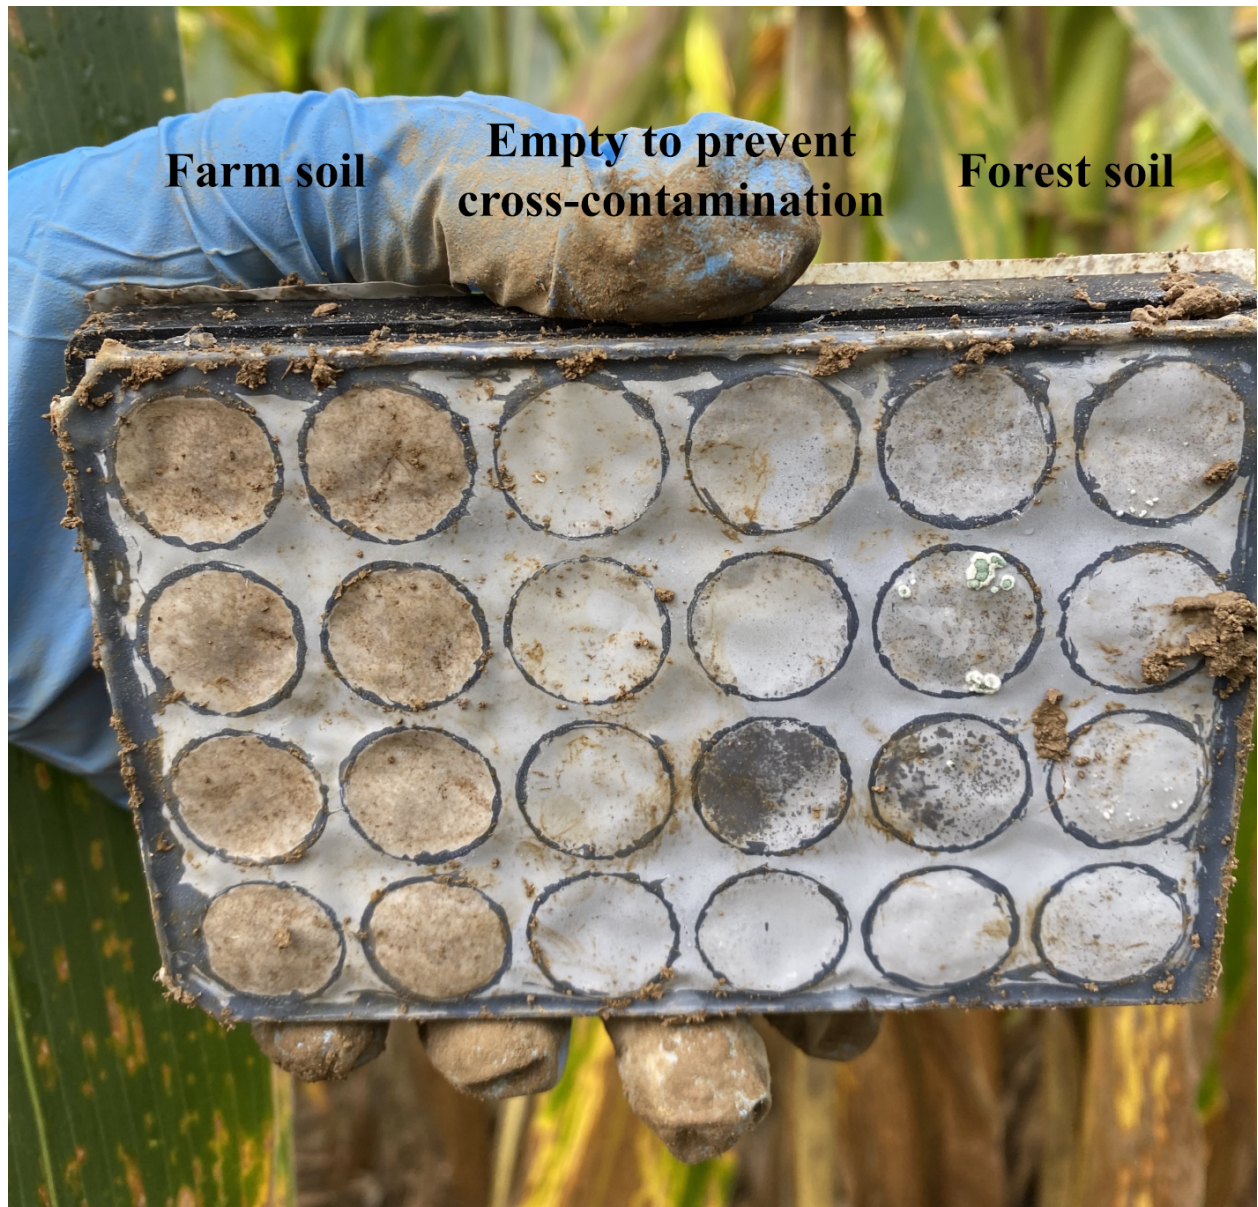

Supplementary Figure 1: A constructed microbial trap with an 18  $\mu\text{m}$  nylon membrane. Microbial trap had been deployed into an agricultural corn field.

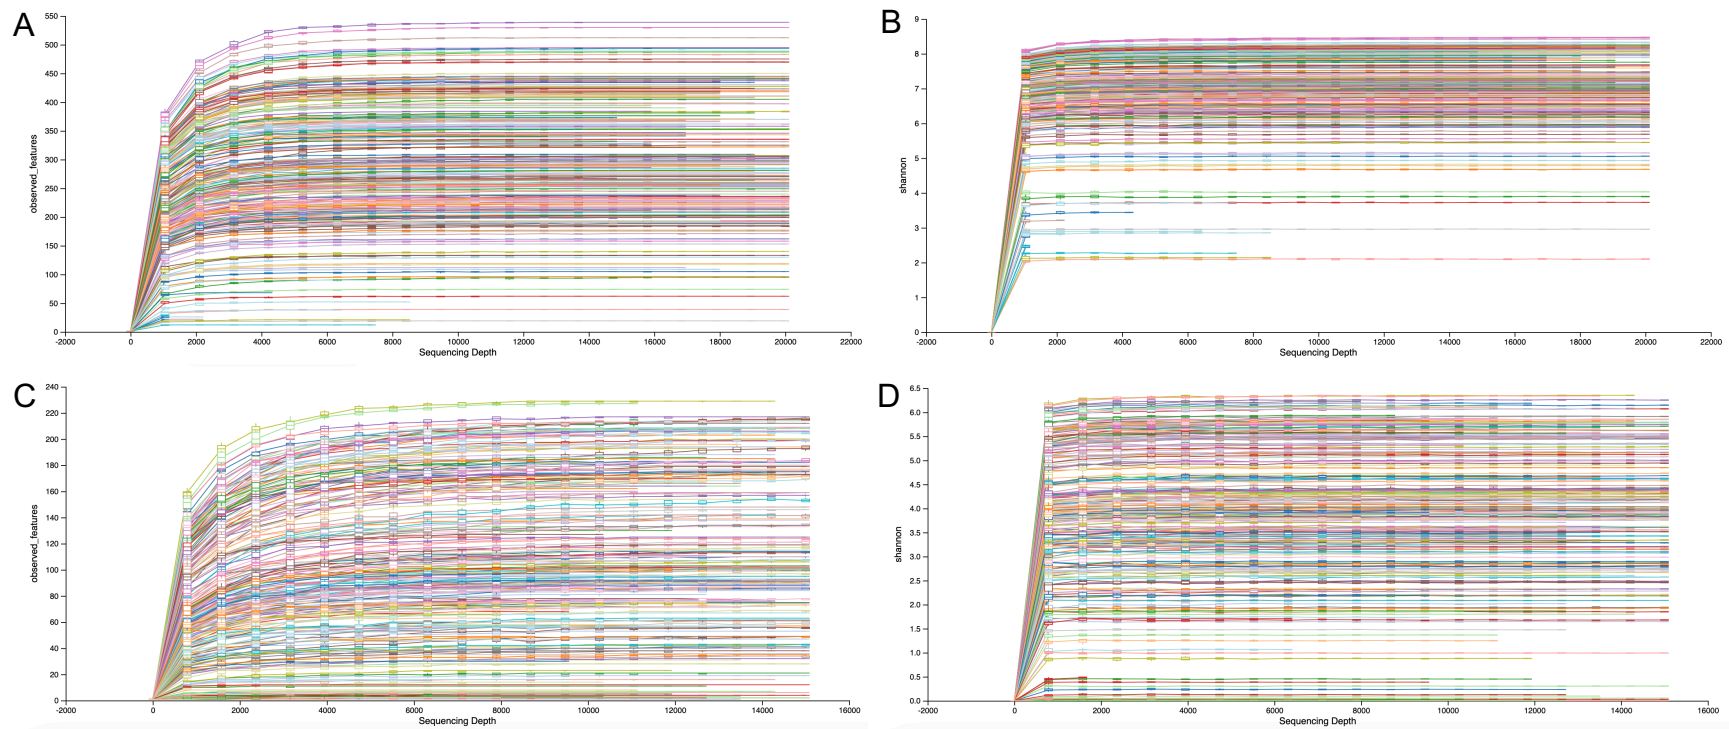

Supplementary Figure 2: Rarefaction curves. A and B are bacterial species richness and diversity, respectively. C and D are fungal species richness and diversity, respectively.

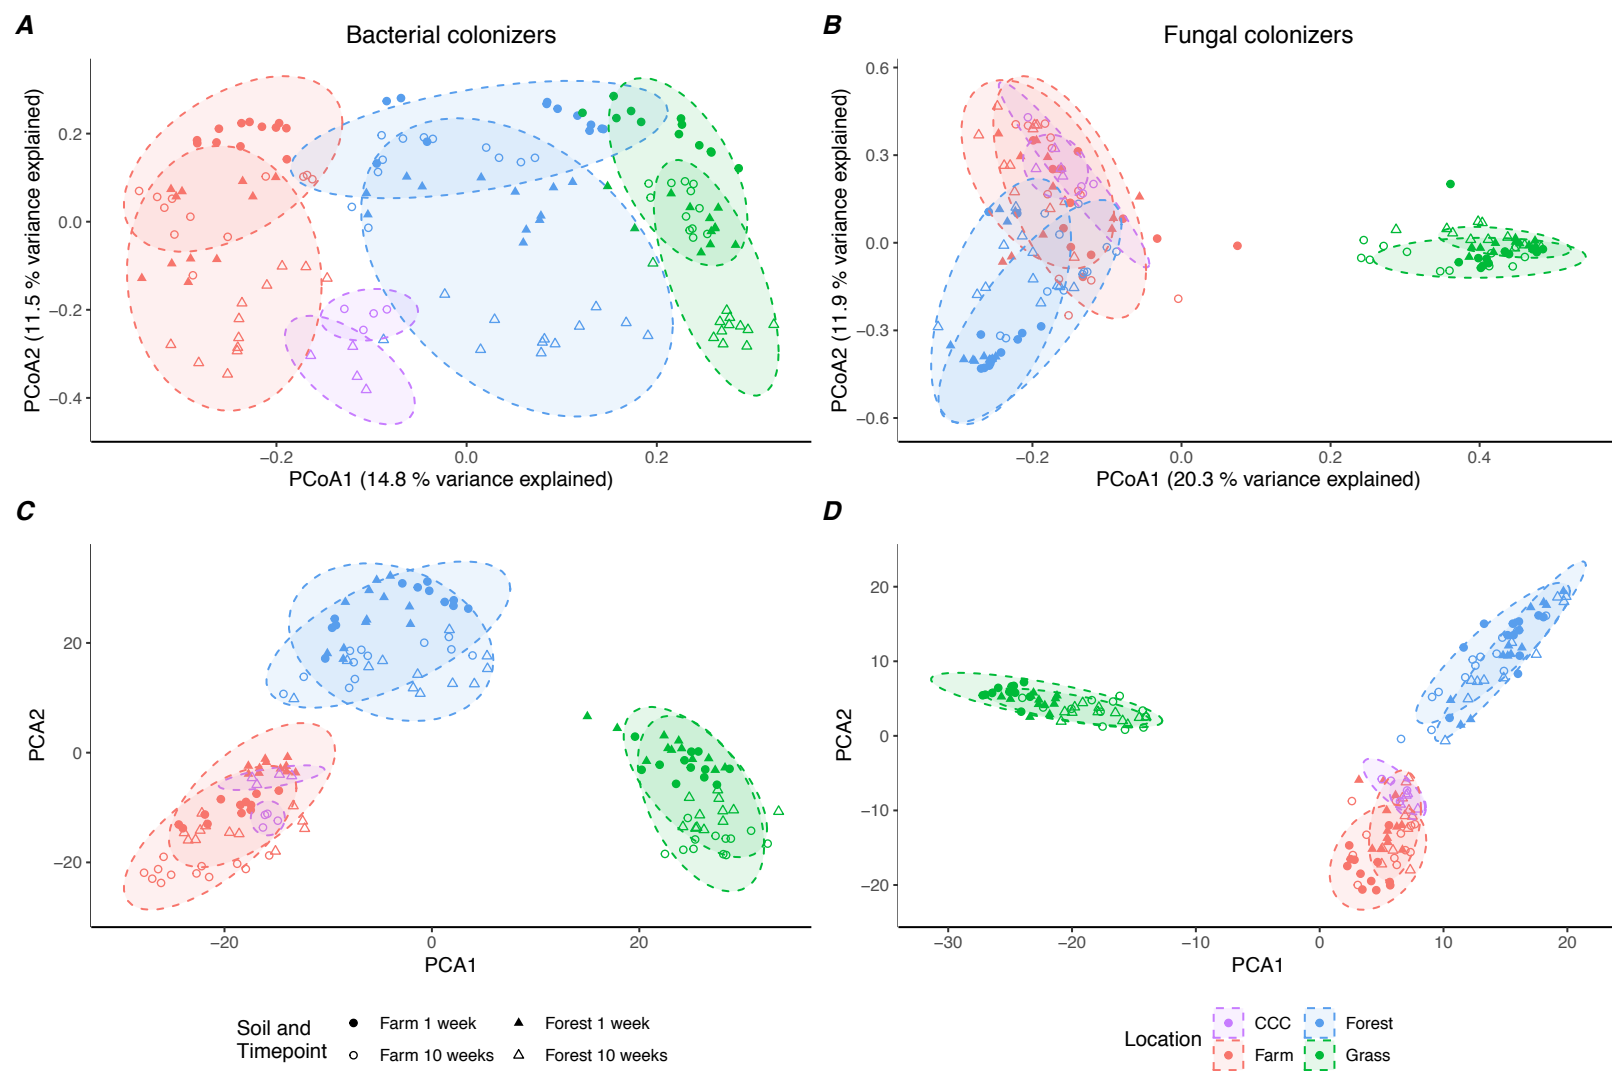

Supplementary Figure 3: PCoA and PCA ordinations of active microbial colonizer and local bulk soil microbial composition. Panels A and B are PCoA ordinations made from rarefied data and a Bray-Curtis index. Panels C and D are PCA ordinations made from unrarefied center-log-transformed data and a Euclidean distance

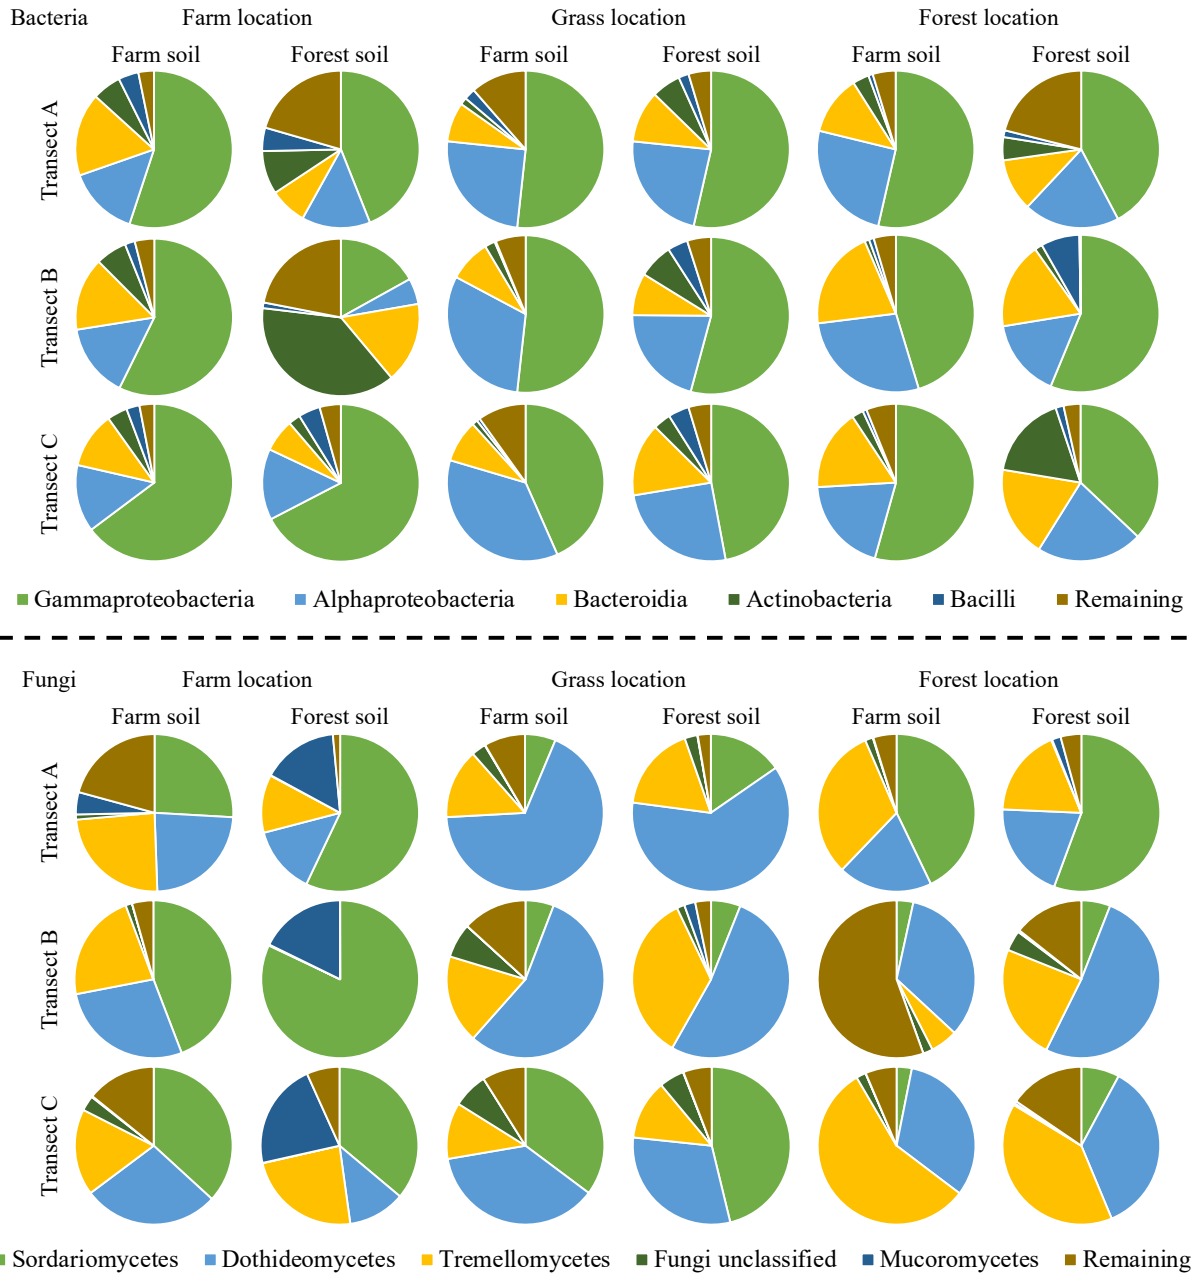

Supplementary Figure 4: Compositional plots for bacterial and fungal compositions at the 1-week collection timepoint. Data were summarized at the Class level and averaged across replicates within a transect per location. Transect A, B and C were the replicated transects within a location. The five most abundant taxa are shown.



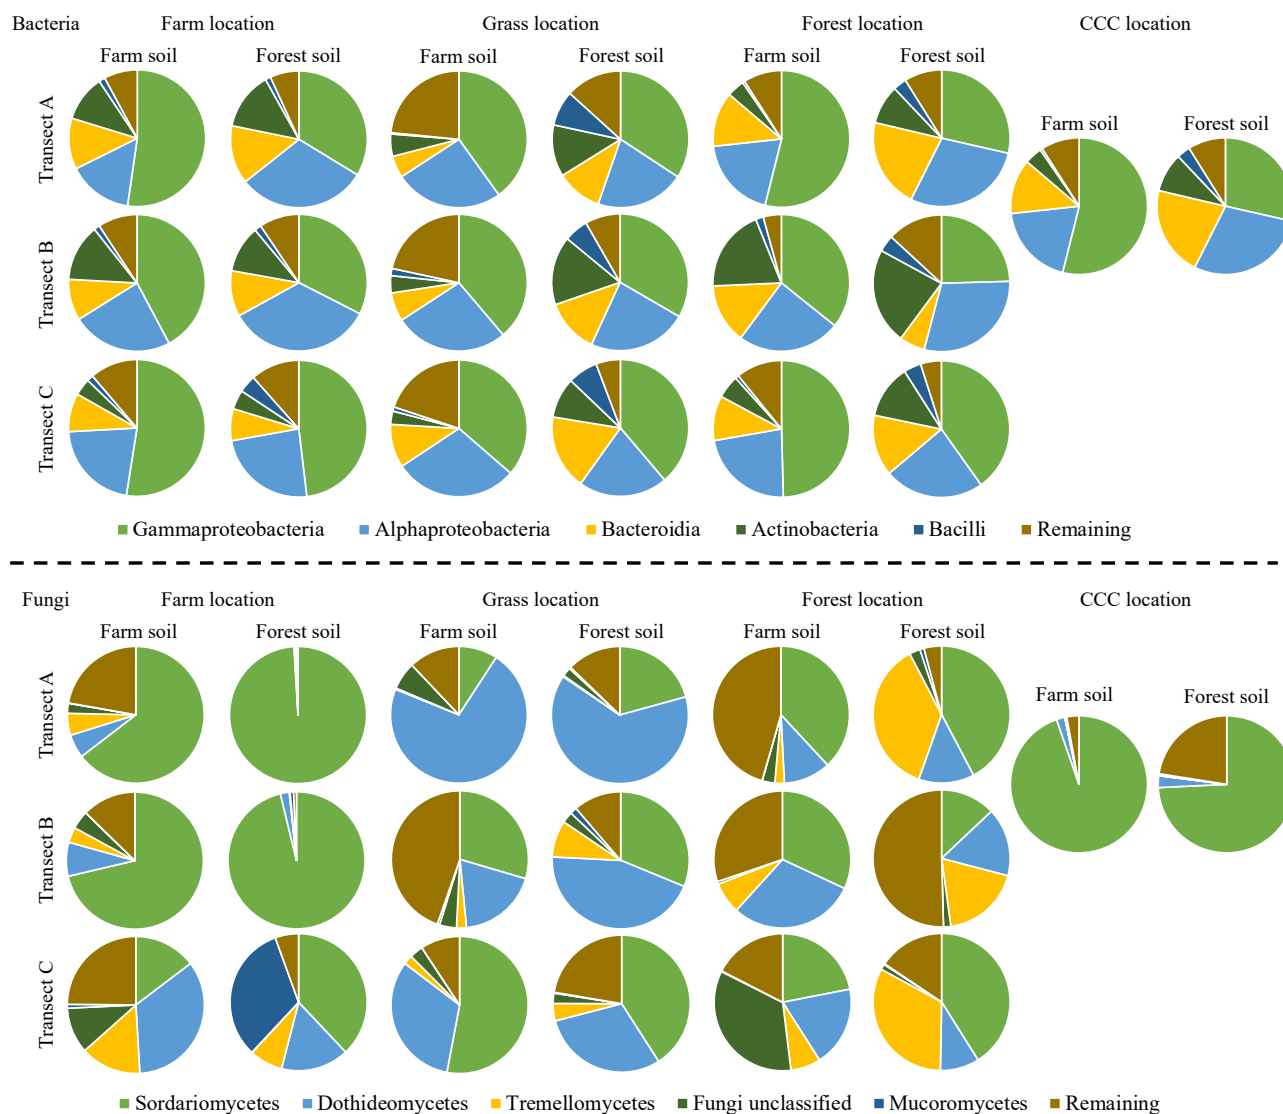

Supplementary Figure 5: Compositional plots for bacterial and fungal compositions at the 10-week collection timepoint. Data were summarized at the Class level and averaged across replicates within a transect per location. Transect A, B and C were the replicated transects within a location. The five most abundant taxa are shown.

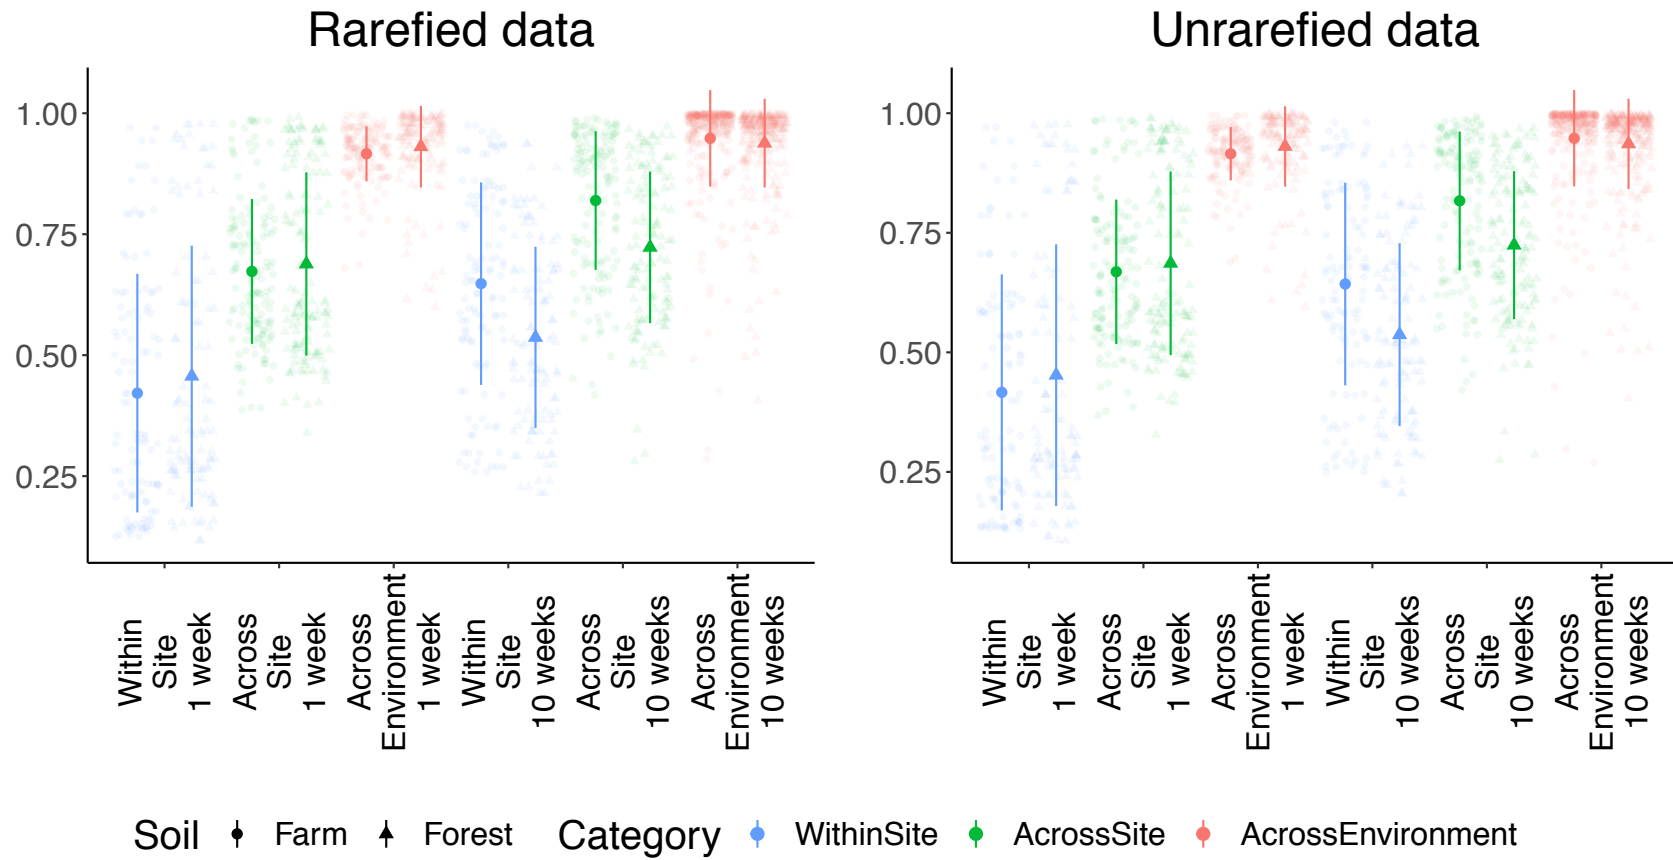

Supplementary Figure 6: Bray-Curtis dissimilarities of fungal compositions within-site, across-sites and across-locations. Shown data is for rarefied and unrarefied fungal composition data. Negligible differences were observed between the two datasets.



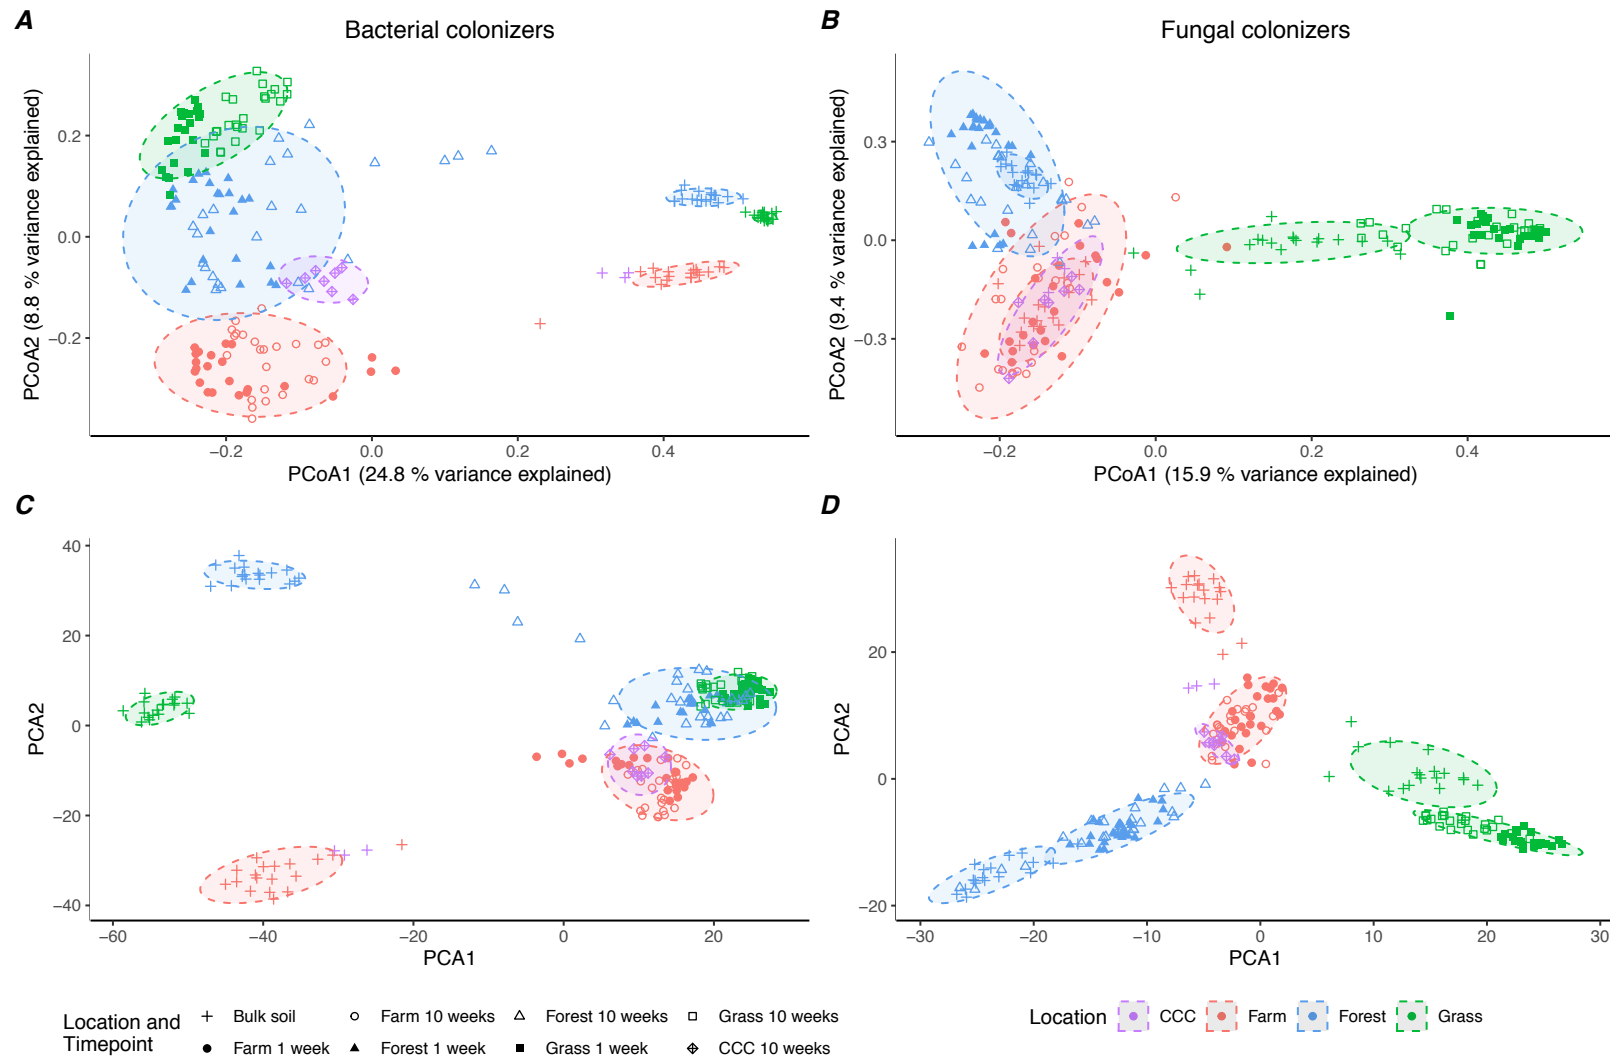

Supplementary Figure 7: PCoA and PCA ordinations of active microbial colonizer and local bulk soil microbial composition. Panels A and B are PCoA ordinations made from rarefied data and a Bray-Curtis index. Panels C and D are PCA ordinations made from unrarefied center-log-transformed data and a Euclidean distance.
